# Supplementary material
Source: MDPI journal article supplement (https://www.mdpi.com/2073-4441/12/8/2196)
Supplement: s1 [file s1]

Supplementary materials

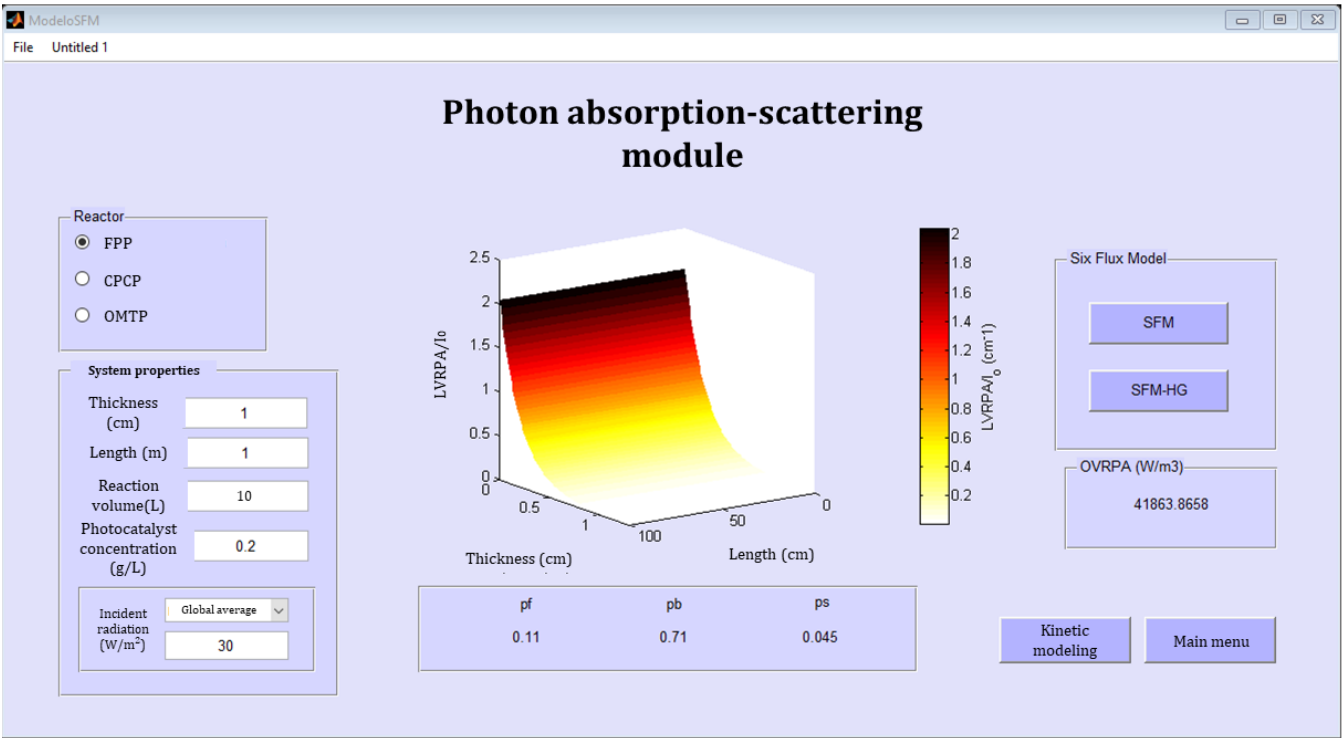

Figure S1. Radiation field simulation of a flat plate photoreactor (FPP) with SFM.
